# Supplementary material for: Glucose oxidase conjugated H2O2 sensitive CdTe QDs: an effective fluorescence tool for glucose sensing
Source: Royal Society of Chemistry journal article supplement (doi:10.1039/c3tb21164a), 2013-01-01
Supplement: c3tb21164a.pdf [file c3tb21164a.pdf]

## Supplementary Material

### Glucose Oxidase Conjugated H<sub>2</sub>O<sub>2</sub> Sensitive CdTe QDs: An Effective Fluorescence Tool for Glucose Sensing

Pooja Singh<sup>#</sup>, Asmita A Prabhune<sup>#</sup>, Satishchandra B Ogale<sup>‡</sup> and Debanjan Guin<sup>#\*</sup>

<sup>‡</sup>Physical and Material Chemistry Division and <sup>#</sup>Biochemical Sciences Division

National Chemical Laboratory, Pashan Road, Pune 411008 INDIA

#### FTIR

MPA capped CdTe QDs showed peaks at 1560 and 1367 cm<sup>-1</sup> corresponds to C=O and CH<sub>2</sub> bending frequencies respectively of MPA molecule. GOx conjugated GNP's showed intense peaks at 1650 and 1565 cm<sup>-1</sup> typical of amide I (-C=O) and amide II (N-H bending) bands of the GOx and a The broad peak at 3278 cm<sup>-1</sup> was assigned the N-H/O-H stretching frequency of GOx and peak at 2971 cm<sup>-1</sup> corresponds to CH<sub>2</sub> stretching of GOx moiety.

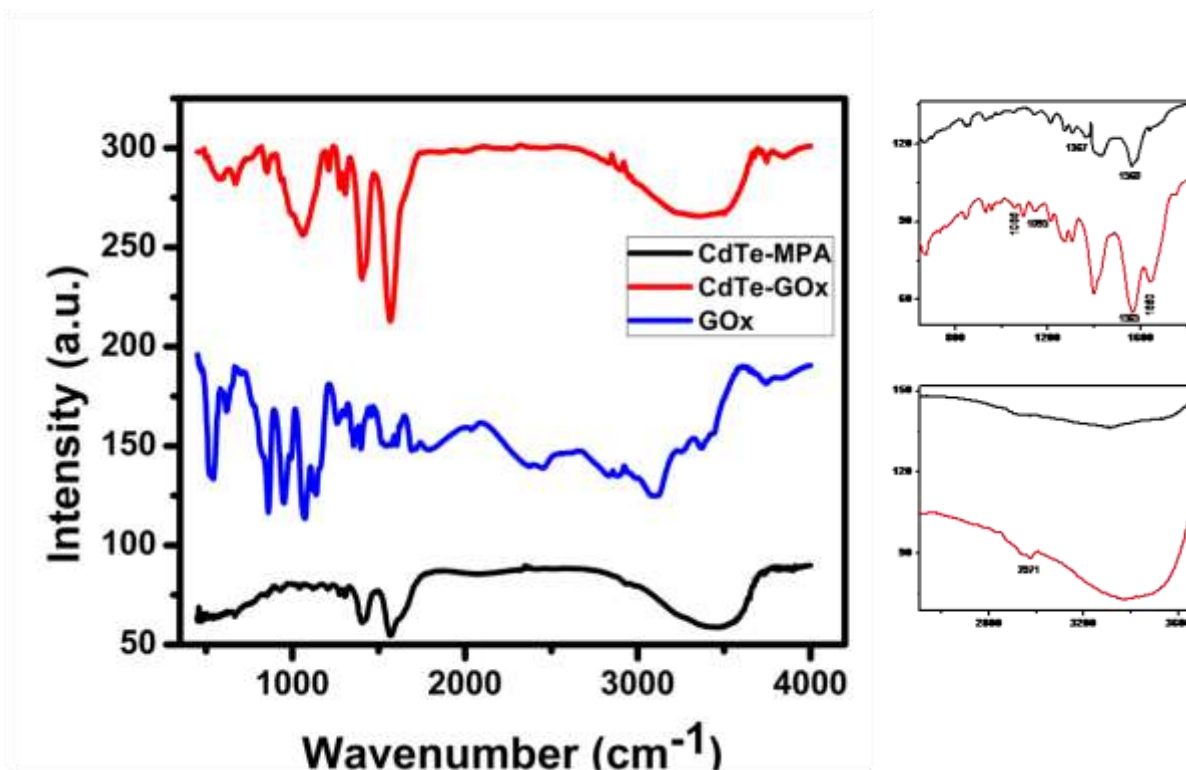

Figure S1. shows the FTIR spectra of CdTe-MPA QDs (black), CdTe-GOx QDs (red) and GOx (blue) .

## Photoluminescence study

We carried out the glucose sensing with blood collected from four different individuals and from there we optimized that our CdTe-GOx sensor can sense glucose even in 10uL of blood as shown in Figure S2 and S3.

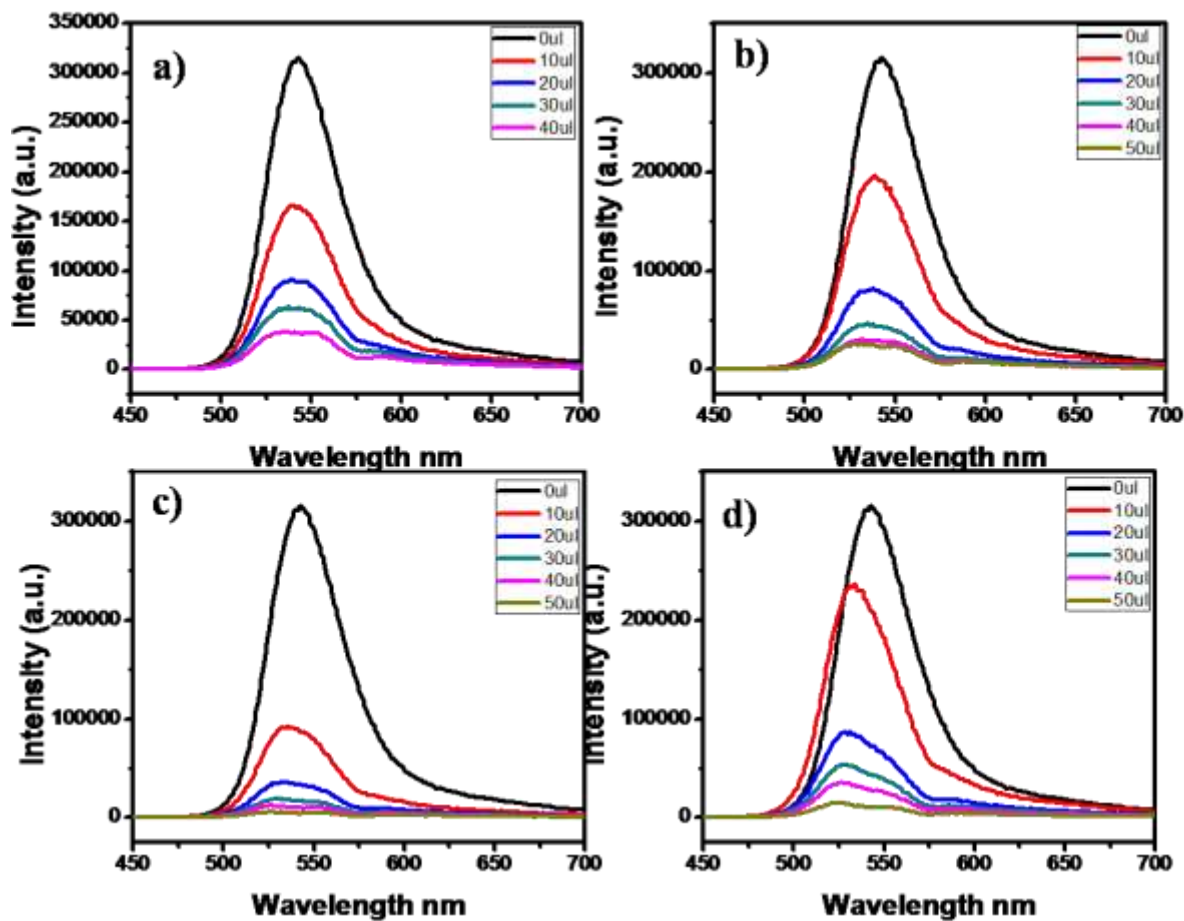

Figure S2 . Photoluminescence spectra of GOx conjugated CdTe with human blood samples.  
(a-Sample1, b-Sample-2, c-Sample-3, d-Sample4)

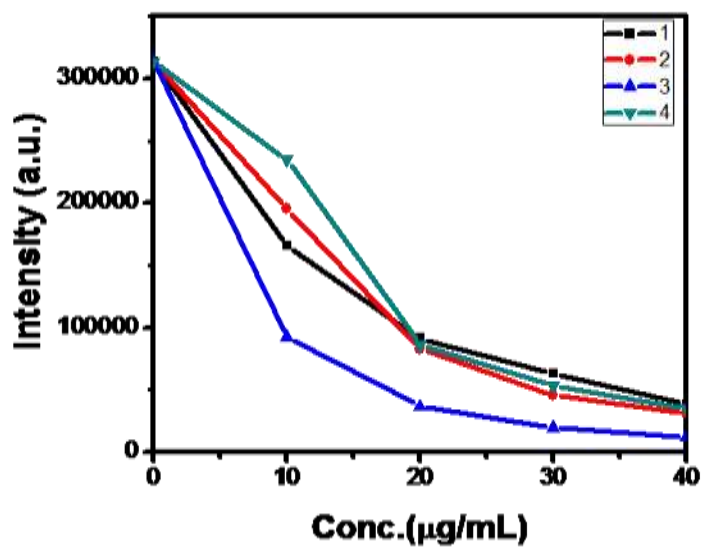

Fig S3 Calibration curve for all the blood samples tested for glucose sensing (a-d)
